# Supplementary material for: Preparation of Affinity Purified Antibodies against ε-Glutaryl-Lysine Residues in Proteins for Investigation of Glutarylated Proteins in Animal Tissues
Source: MDPI journal article supplement (doi:10.3390/biom11081168), 2021-08-07
Supplement: s1 [file s1]

# Preparation of Affinity Purified Antibodies Against $\epsilon$ -Glutaryllysine Residues in Proteins for Investigation of Glutarylated Proteins in Animal Tissues

Ekaterina F. Kolesanova<sup>1\*</sup>, Aleksandra I. Boyko<sup>2</sup>, Anastasiya A. Chashnikova<sup>2</sup>, Sergei .N. Gnedoy<sup>3</sup>, Thilo Kaehne<sup>4</sup>, Daria A. Ivanova<sup>1</sup>, Alyona V. Kolesnichenko<sup>1</sup>, Vasily A. Aleshin<sup>2,5</sup>, Artem V. Artiukhov<sup>2,5</sup>, Victoria I. Bunik<sup>2,5,6\*</sup>

<sup>1</sup> Institute of Biomedical Chemistry, Moscow, Russia; ekaterina.kolesanova@ibmc.msk.ru

<sup>2</sup> Faculty of Bioengineering and Bioinformatics, Lomonosov Moscow State University, 119991 Moscow, Russia; bunik@belozersky.msu.ru

<sup>3</sup> "Agrobiomed" Ltd., 249010, Borovsk, Kaluga region, Russia; sngnedoy@mail.ru

<sup>4</sup> Institute of Experimental Internal Medicine, Otto-von-Guericke University, 39120 Magdeburg, Germany

<sup>5</sup> Belozersky Institute of Physico-Chemical Biology, Lomonosov Moscow State University 119991 Moscow, Russia

<sup>6</sup> Department of Biological Chemistry, Sechenov First Moscow State Medical University, 119146 Moscow, Russia

\* Correspondence: E.F.K., ekaterina.kolesanova@ibmc.msk.ru; Tel.: +7 499 246 3375; V.I.B. bunik@belozersky.msu.ru

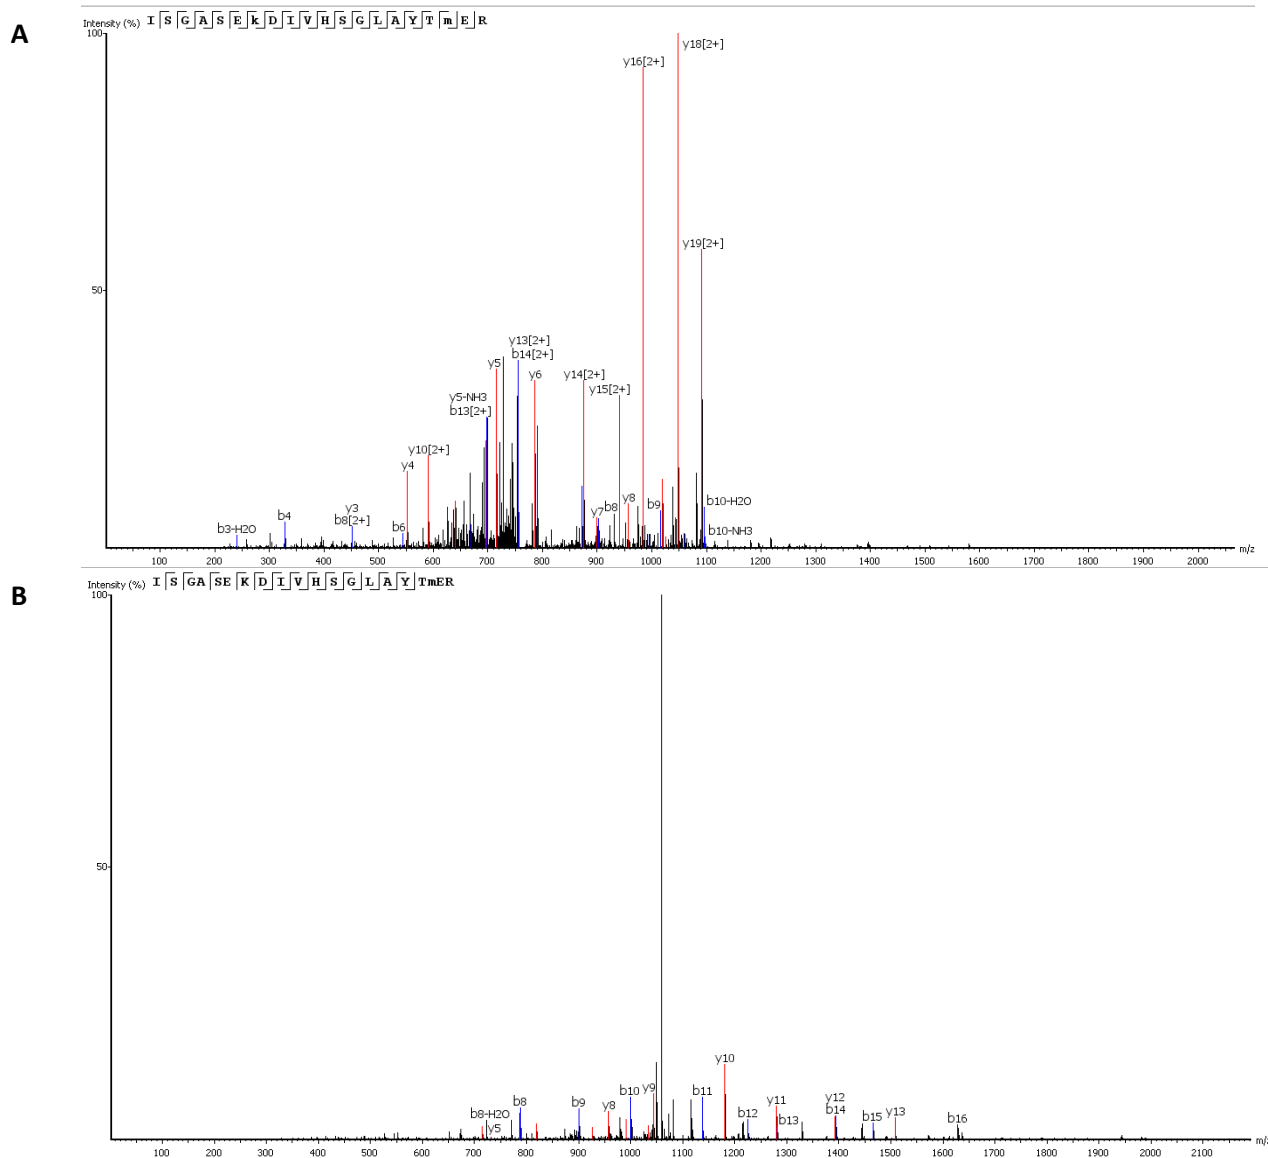

**Figure S1.** Representative MS/MS spectra of the GDH peptides containing K503 residue. **(A)** – the peptide with glutarylated K503; **(B)** – the peptide comprising non-glutarylated K503. The images of the spectra were prepared in PEAKS Studio 8.0. Glutarylation is confirmed by the increase of 114.03 (for

single-charged ions) or 57.02 (for double-charged ions) in fragment ion monoisotopic  $m/e$  values compared to fragment ion  $m/e$  values in MS/MS spectrum of the non-glutarylated peptide.
